# Supplementary material for: Simultaneous Heterotrophic Nitrification and Aerobic Denitrification byChryseobacteriumsp. R31 Isolated from Abattoir Wastewater
Source: Hindawi journal article supplement (doi:10.1155/2014/436056), 2014-01-01
Supplement: f1 [file 436056.f1.pdf]

1 **Supplemenatry File 1**

2

| <b>Isolate No.</b> | <b>Colony size</b> | <b>Colony pigmentation</b> | <b>Colony form</b> | <b>Colony margin</b> | <b>Colony elevation</b> | <b>Taxonomic affiliation based on 16S rDNA sequence</b> | <b>Ammonium nitrogen removal (%)</b> |
|--------------------|--------------------|----------------------------|--------------------|----------------------|-------------------------|---------------------------------------------------------|--------------------------------------|
| R11                | Large              | White                      | Irregular          | Serrate              | Flat                    | In progress                                             | 48.57                                |
| R12                | Moderate           | Light Yellow               | Circular           | Entire               | Flat                    | <i>Bacillus</i> sp.                                     | 51.24                                |
| R13                | Moderate           | White                      | Circular           | Entire               | Umbonate                | In progress                                             | 55.32                                |
| R14                | Small              | White                      | Circular           | Entire               | Raised                  | In progress                                             | 52.41                                |
| R15                | Large              | White                      | Irregular          | Undulate             | Flat                    | In progress                                             | 67.54                                |
| R16                | Small              | White                      | Irregular          | Entire               | Raised                  | In progress                                             | 58.22                                |
| R30                | Moderate           | Light Yellow               | Circular           | Entire               | Flat                    | In progress                                             | 64.21                                |
| R31                | Moderate           | Yellow                     | Circular           | Entire               | Flat                    | <i>Chryseobacterium</i> sp.                             | 95.87                                |
| R32                | Moderate           | White                      | Circular           | Entire               | Flat                    | <i>Exiguobacterium aurantiacum</i>                      | 61.25                                |
| S18                | Pin Point          | White                      | Circular           | Entire               | Raised                  | <i>Achromobacter xylosoxidans</i>                       | 97.2                                 |

## Supplementary file 2

### Morphological and physiological characteristics of *Chryseobacterium* sp. R31

#### Morphology

|                                   |                                           |
|-----------------------------------|-------------------------------------------|
| Colony morphology (nutrient agar) | Circular, yellowish, opaque, entire edges |
| Motility                          | Non-motile                                |
| Gram-staining                     | Negative                                  |

#### Growth conditions

|                                   |                         |
|-----------------------------------|-------------------------|
| Temperature range                 | Good growth at 25–42 °C |
| pH range                          | 6.0–7.5                 |
| Relation to oxygen                | Obligate aerobic        |
| Growth in the presence of 7% NaCl | Positive                |

#### Physiological characteristics

|          |                                                                                                                                                                                                                                                                                                           |
|----------|-----------------------------------------------------------------------------------------------------------------------------------------------------------------------------------------------------------------------------------------------------------------------------------------------------------|
| Negative | Acid production from sucrose, lactose, xylose, sorbitol, inositol, trehalose and manitol, catalase, urease, lysine decarboxylase, <i>o</i> -nitrophenyl- $\beta$ -galactoside, DNA hydrolysis, Indole test, flexirubin pigment, starch hydrolysis, Voges Proskauer test, methyl-red test, Simmons citrate |
| Positive | Acid production from glucose, fructose, arabinose, maltose, galactose and mannose, indophenols oxidase, nitrate reduction, arginine dihydrolase, aesculin hydrolysis, gelatin liquefaction, Tween 80 hydrolysis, tyrosine hydrolysis, H <sub>2</sub> S production                                         |

#### Sole carbon source utilization test

|          |                                                                                                                       |
|----------|-----------------------------------------------------------------------------------------------------------------------|
| Negative | Sucrose, lactose, xylose, sorbitol, inositol, trehalose, mannitol, phenol, ethanol, sodium citrate and sodium acetate |
| Positive | Glucose, fructose, arabinose, maltose, galactose, mannose, glycerol, methanol and sodium succinate.                   |

1  
2 **Sole nitrogen source utilization test**

3  
4 Negative Urea, cobaltous nitrate and casamino acid

5  
6 Positive Ammonium molybdate, ammonium nitrate,  
7 calcium nitrate, potassium nitrate, ammonium  
8 chloride, ammonium sulphate, sodium nitrate,  
9 sodium glutamate and peptone

10  
11 **Amino acid utilization test**

12  
13 Negative Methionine, glycine, aspartic acid, glutamic  
14 acid, glutamine, asparagine, leucine and cystine

15  
16 Positive Tyrosine, tryptophan, serine, isoleucine, OH-  
17 proline, lysine, histidine, arginine, cysteine,  
18 valine, phenylalanine, threonine, proline and  
19 alanine  
20

21 **Antibiotic susceptibility/resistance characteristics**

22  
23 Susceptible Carbenicillin, oleandomycin, chloramphenicol,  
24 tetracycline, kanamycin, lincomycin and  
25 vancomycin

26  
27 Resistant Gentamycin, streptomycin, ampicillin,  
28 penicillin-G and neomycin  
29  
30  
31

### Supplementary File 3

Results of the identity analysis of strain *Chryseobacterium* sp. R31 based on 16S rRNA gene sequence performed on the EzTaxon server (last accessed on 20/02/2014). 1373 bp 16S rRNA gene of *Chryseobacterium* sp. R31 has NCBI Accession No. KF751764

| Rank according to similarity | Species Name                                                 | NCBI Accession No. | Pairwise similarity (%) | Dissimilar nucleotides/total nucleotides |
|------------------------------|--------------------------------------------------------------|--------------------|-------------------------|------------------------------------------|
| 1                            | <i>Chryseobacterium haifense</i> H38 <sup>T</sup>            | EF204450           | 98.25                   | 24/1371                                  |
| 2                            | <i>Amoebinatus massiliae</i> 7Ebis                           | AF531765           | 97.60                   | 33/1373                                  |
| 3                            | <i>Chryseobacterium anthropi</i> NF 1366 <sup>T</sup>        | AM982786           | 97.52                   | 34/1369                                  |
| 4                            | <i>Chryseobacterium pallidum</i> 26-3St2b <sup>T</sup>       | AM232809           | 96.72                   | 45/1371                                  |
| 5                            | <i>Chryseobacterium carnis</i> NCTC 13525 <sup>T</sup>       | JX100817           | 96.70                   | 45/1365                                  |
| 6                            | <i>Chryseobacterium hominis</i> NF802 <sup>T</sup>           | AM261868           | 96.43                   | 49/1372                                  |
| 7                            | <i>Chryseobacterium molle</i> DW3 <sup>T</sup>               | AJ534853           | 96.42                   | 49/1369                                  |
| 8                            | <i>Chryseobacterium hispanicum</i> VP48 <sup>T</sup>         | AM159183           | 96.34                   | 50/1366                                  |
| 9                            | <i>Chryseobacterium koreense</i> Chj707 <sup>T</sup>         | AF344179           | 96.06                   | 54/1371                                  |
| 10                           | <i>Chryseobacterium gambrini</i> 5-1St1a <sup>T</sup>        | AM232810           | 95.81                   | 57/1360                                  |
| 11                           | <i>Chryseobacterium treverense</i> IMMIB L-1519 <sup>T</sup> | FN297836           | 95.70                   | 59/1373                                  |
| 12                           | <i>Chryseobacterium piscicola</i> VQ-6316s <sup>T</sup>      | EU869190           | 95.63                   | 60/1373                                  |

# 1    **Supplementary File 4**

## 2    **Long chain fatty acid composition of the isolate R31**

3

| Sl. No. | Fatty Acid       | Percent (%) |
|---------|------------------|-------------|
| 1       | 13:0 iso c       | 4.22        |
| 2       | 13:0 anteiso c   | 0.39        |
| 3       | 14:0 iso c       | 0.86        |
| 4       | 15:0 iso c       | 40.40       |
| 5       | 15:0 anteiso c   | 19.44       |
| 6       | 16:0 iso c       | 1.04        |
| 7       | Sum In Feature 3 | 4.10        |
| 8       | 15:0 iso c 3OH   | 3.12        |
| 9       | 15:0 c 2OH       | 1.09        |
| 10      | 17:1 iso c ω9c   | 9.94        |
| 11      | 16:0 iso c 3OH   | 1.53        |
| 12      | 18:1 iso c ω5c   | 0.65        |
| 13      | 17:0 iso c 3OH   | 11.13       |
| 14      | 17:0 c 2OH       | 2.07        |

4  
5  
6  
7  
8
